# Supplementary material for: Unveiling the Mechanism and Stereochemical Pathways for BF 3 - mediated [3+2] Cycloaddition of N-boranonitrone with Alkenes: A DFT Study
Source: Research Square preprint supplement (doi:10.21203/rs.3.rs-7581670/v1), 2025-09-22
Supplement: Supplementary file 1 [file ef530e800864fd83f6038bae.docx]

**SUPPORTING INFORMATION**

**Unveiling the Mechanism and Stereochemical Pathways for BF3-mediated [3+2] Cycloaddition of N-boranonitrone with Alkenes: A DFT Study**

Ravi Bariya [1], Ankit Patel [2],Sangita Sharma*[2]

1Government Science College, Zalod. Dist. Dahod, Gujarat, India 389170.

2Department of Chemistry, Hemchandracharya North Gujarat University, Patan, Gujarat, India 384265

*Corresponding author. E-mail: sangitamem2000@gmail.com

Contributing authors: ravibariya25@gmail.com, ankitbsp372@gmail.com

M06-2X /6-31+G(d,p) computed total energies, unique imaginary frequency, and cartesian coordinates of the stationary points involved in the reaction of N-boranonitrone **6a** with alkenes (**7a**: styrene; **7b**: n-hexene; and **7c**: ethyl methacrylate).

N-boranonitrone **6a**

E (M06-2X) = -660.89 hartree

O 2.68492600 1.48649800 0.00011700

B 1.46058800 -0.73103700 0.00017500

O -0.07776400 -0.78233600 0.00004800

C -0.53984100 0.41426500 -0.00008500

C 0.40034200 1.47011700 -0.00008600

N 1.60880500 0.90049200 0.00003100

F 1.94749400 -1.23586700 -1.15466600

F 1.94730000 -1.23565800 1.15518900

C -2.70378800 -0.52431100 -0.00017800

H 0.21799600 2.53305700 -0.00016700

H -2.47763400 -1.11879700 -0.88821000

H -2.47777100 -1.11866100 0.88798100

O -1.81943300 0.63237000 -0.00019700

C -4.11678300 0.00787000 -0.00032700

H -4.81718100 -0.83058300 -0.00031700

H -4.30233800 0.61534200 0.88802500

H -4.30220100 0.61520600 -0.88880100

**alkene 7a (styrene)**

E (M06-2X) = -309.52 hartree

C -1.35444600 1.32903000 -0.00001000

C 0.01437700 1.08793000 -0.00003000

C 0.51146300 -0.22375600 -0.00002100

C -0.40707800 -1.28079700 0.00000100

C -1.77973900 -1.04239800 0.00002200

C -2.25883700 0.26500200 0.00001700

H -1.71986500 2.35133000 -0.00001900

H 0.70183700 1.92809500 -0.00006000

H -0.03684900 -2.30290900 0.00000500

H -2.47294400 -1.87778300 0.00004000

H -3.32711000 0.45669500 0.00003200

C 1.95372300 -0.53465100 -0.00003500

C 2.96425000 0.33874300 0.00004700

H 2.19018600 -1.59797600 -0.00011600

H 3.99240200 -0.00559300 0.00002600

H 2.81006700 1.41351200 0.00014200

**alkene 7b (**n-hexene**)**

E (M06-2X) = -235.73 hartree

C -2.03155900 -0.19875100 0.39618200

C -3.06668900 -0.18564500 -0.44247900

H -2.07185200 -0.84074700 1.27750200

H -3.06226500 0.43895800 -1.33278200

H -3.94910200 -0.79290500 -0.26827900

C -0.77041000 0.59598400 0.21836900

C 0.47074900 -0.29553500 0.09581900

H -0.63732100 1.26708400 1.07847300

H -0.85917400 1.23194900 -0.67117200

C 1.76571600 0.50323900 -0.03962700

H 0.53751900 -0.94914800 0.97671500

H 0.35245300 -0.95757200 -0.77193300

C 2.99658500 -0.39227600 -0.16401700

H 1.69480100 1.15849300 -0.91726900

H 1.87454400 1.16341200 0.83053400

H 3.91378100 0.19532000 -0.26028300

H 3.10085200 -1.03593100 0.71567300

H 2.91941200 -1.04101500 -1.04266500

**alkene 7c** (ethyl methacrylate)

E (M06-2X) = -384.95 hartree

C -1.61585700 0.23720100 0.00000500

C -2.75991600 -0.45012500 0.00006300

H -2.74671900 -1.53510400 0.00008700

H -3.71907000 0.05820900 0.00008700

C -1.52372700 1.73732100 -0.00002700

H -0.97923600 2.09528900 0.87835900

H -0.97924900 2.09525400 -0.87843400

H -2.52268000 2.17806800 -0.00002700

C -0.34558000 -0.55911900 -0.00002400

O -0.27705800 -1.76722000 0.00000300

O 0.73874800 0.23547700 -0.00006900

C 2.00575700 -0.44083400 -0.00006100

C 3.08341200 0.62108000 0.00009400

H 2.05780000 -1.08375600 -0.88367900

H 2.05770200 -1.08392600 0.88343600

H 3.00207600 1.25387300 0.88723200

H 4.06918300 0.14883500 0.00008600

H 3.00215100 1.25405700 -0.88692200

**TS1-cis**

E (M06-2X) = -970.37 hartree

frequency = -535.4 cm-1

O -0.71165400 0.62977800 -1.81279800

B 0.58185600 1.60284300 0.12974600

O 2.00755700 0.97607900 0.52881600

C 2.28155100 0.05839900 -0.29125300

C 1.29287100 -0.19589700 -1.32473400

N 0.40618300 0.81309400 -1.21740500

F 0.74851400 2.93616200 -0.01777000

F -0.30104300 1.20528700 1.08071900

C 4.26215800 -0.36202100 0.90899700

H 1.54603500 -0.66285200 -2.26764600

H 4.57431200 0.68065100 0.81733000

H 3.69613600 -0.47925000 1.83588400

O 3.35983100 -0.65163700 -0.19949200

C -4.64932100 -0.00692400 -0.12690200

C -3.54512400 -0.36336200 -0.89247700

C -2.37046500 -0.83734200 -0.29166600

C -2.33696600 -0.95168200 1.10228700

C -3.43936600 -0.59046100 1.87171400

C -4.60024100 -0.11818500 1.26262700

H -5.54700900 0.36200600 -0.61332800

H -3.57751700 -0.26028300 -1.97406400

H -1.44545800 -1.31947400 1.59912300

H -3.39067900 -0.68084800 2.95246600

H -5.45958100 0.15947400 1.86480200

C -1.24090800 -1.22189700 -1.16758000

C -0.01443900 -1.73618400 -0.72270000

H -1.53542000 -1.47901700 -2.18139100

H 0.18538300 -1.79113100 0.34473400

H 0.47118800 -2.50400500 -1.31521200

C 5.41548500 -1.32975800 0.80020200

H 5.94195600 -1.20092900 -0.14782600

H 6.11854600 -1.14366500 1.61543800

H 5.06503000 -2.36147100 0.87296300

**TS1-trans**

E (M06-2X) = -970.38 hartree

frequency = -517.93 cm-1

O -0.80437000 1.22394500 -0.73954100

B 1.53403500 1.91655900 -0.15751500

O 2.69137100 0.82394600 -0.02816600

C 2.19723400 -0.30891900 -0.29200400

C 0.78552300 -0.32602900 -0.61848900

N 0.44693500 0.96963400 -0.78118100

F 1.97643900 2.90536800 -0.96373900

F 1.18003300 2.28185700 1.10781300

C 4.28804300 -1.27859900 0.18880200

H 0.30565900 -1.13631700 -1.15258100

H 4.78902700 -0.61886300 -0.52296600

H 4.30195700 -0.80841200 1.17470100

O 2.89402500 -1.39688800 -0.22404500

C -5.05186700 0.18225700 0.17621600

C -3.80561400 0.58919400 0.64458200

C -2.67322400 -0.21477400 0.46878300

C -2.81966500 -1.43299600 -0.20808800

C -4.06305000 -1.84054600 -0.68065300

C -5.18607400 -1.03597700 -0.48743600

H -5.91824300 0.81890400 0.32639300

H -3.70097400 1.54447300 1.15183900

H -1.95599400 -2.07205800 -0.37149900

H -4.15666400 -2.78739700 -1.20370700

H -6.15607800 -1.35504100 -0.85520700

C -1.36704900 0.25942900 0.96074800

C -0.28289500 -0.59604100 1.19131700

H -1.37309100 1.21466700 1.47676500

H 0.48117600 -0.26459400 1.88874900

H -0.42043000 -1.67151900 1.13162700

C 4.86265000 -2.67437100 0.19699000

H 4.80950600 -3.12149600 -0.79788100

H 5.91090900 -2.62927000 0.50137900

H 4.32398300 -3.31212800 0.90097400

**TS2-cis**

E (M06-2X) = -896.59 hartree

frequency = -514.03 cm-1

C 1.18889000 -1.70086700 -0.59434400

C -0.12029700 -2.08427900 -0.28984900

H 1.65646800 -2.16569500 -1.46029900

H -0.48309500 -1.93360200 0.72621700

H -0.59129700 -2.89279600 -0.83885700

C 2.13479600 -1.22320600 0.48038700

C 3.35808900 -0.46284100 -0.02666500

H 2.47643800 -2.11469200 1.02880500

H 1.58290300 -0.60670900 1.19841600

C 4.34535700 -0.13747400 1.09251500

H 3.86640900 -1.05897700 -0.79872600

H 3.02756800 0.46078300 -0.51242500

C 5.56418900 0.63390100 0.59039300

H 3.82990200 0.44940400 1.86366900

H 4.67127000 -1.06783800 1.57658400

H 6.26055100 0.86160000 1.40255400

H 6.10672900 0.05633800 -0.16572500

H 5.26176200 1.58022600 0.13055100

O 0.93296800 -0.00745500 -1.64010800

B -0.49934400 1.45646100 -0.15430900

O -1.99076900 1.01036500 0.18804700

C -2.26836000 -0.01957100 -0.49233800

C -1.21234700 -0.52379400 -1.34383600

N -0.23041800 0.38901900 -1.27365000

F 0.25523700 1.24483400 0.95949200

F -0.54003300 2.73450800 -0.60001200

H -1.38760900 -1.16010200 -2.19977100

O -3.41146300 -0.61997900 -0.40535500

C -4.37142300 -0.12221500 0.57350300

C -4.01065600 -0.61475500 1.95964700

H -5.31971400 -0.52804700 0.22369300

H -4.38709400 0.96707000 0.51078600

H -3.05254200 -0.20307800 2.28415700

H -4.77901500 -0.29036200 2.66607900

H -3.96214000 -1.70587900 1.97892100

**TS2-trans**

E (M06-2X) = -896.59 hartree

frequency = -492.85 cm-1

C 1.46436500 0.21687700 0.35643600

C 0.60950700 -0.88296700 0.28488300

H 1.40519200 0.84150000 1.24465200

H -0.07451900 -1.08414400 1.10501900

H 0.89246400 -1.74031800 -0.32201900

C 2.76461700 0.24110900 -0.39917800

C 3.90794300 -0.42145000 0.37648000

H 3.02728200 1.28023900 -0.62801400

H 2.62752100 -0.26945000 -1.36253100

C 5.24127400 -0.35764000 -0.36676800

H 4.01298000 0.06696900 1.35505000

H 3.65078300 -1.46946200 0.58163500

C 6.37776700 -1.01926900 0.40986100

H 5.13148500 -0.84114800 -1.34618100

H 5.49146300 0.69175400 -0.56745500

H 7.32386000 -0.96443100 -0.13584300

H 6.52112000 -0.53260300 1.38020800

H 6.15891900 -2.07567500 0.59781100

O 0.56225400 1.61748300 -0.71553900

B -1.71096700 1.64206100 0.33812100

O -2.71020000 0.42372300 0.12535400

C -2.16120400 -0.40763000 -0.65691200

C -0.85242400 -0.04463600 -1.14608300

N -0.65575900 1.22306800 -0.74950900

F -1.17974100 1.51615700 1.58838800

F -2.37772600 2.79047900 0.08719700

H -0.37086400 -0.49689200 -2.00126600

O -2.71329500 -1.53735400 -0.96469000

C -3.96508900 -1.88694300 -0.30311700

C -3.69342000 -2.39327500 1.09839100

H -4.38303300 -2.65845200 -0.94842500

H -4.61072600 -1.00728400 -0.30913600

H -4.63434600 -2.71558200 1.55165300

H -3.01181100 -3.24655100 1.07287800

H -3.26551300 -1.60584000 1.72270000

**TS3-cis**

E (M06-2X) = -1045.81 hartree

frequency = -511.42 cm-1

O 0.92965200 -0.32471000 1.55522300

B -0.73251000 1.40104600 0.64881900

O -1.96402500 0.83974400 -0.21408100

C -2.10164400 -0.39067900 0.02078700

C -1.05024000 -1.02625600 0.80994300

N -0.23550300 -0.00416400 1.15918800

F -1.29794600 2.11939400 1.66030100

F 0.11734600 2.08320800 -0.13826600

H -1.25560700 -1.86949300 1.45879500

O -3.08249500 -1.08491300 -0.45570200

C -4.07154000 -0.39397000 -1.27884800

H -3.53714900 0.27279000 -1.95771800

C 1.48047700 -1.66472800 0.08312900

C 0.22692700 -2.08454600 -0.38351600

H -0.10401700 -3.08662200 -0.12601100

H -0.09286300 -1.70963900 -1.35138600

C 2.32224700 -2.50383500 0.99862800

H 2.98500900 -3.16127000 0.42605600

H 2.93917400 -1.87281200 1.64019600

H 1.67898200 -3.12355200 1.62952300

C 2.09201700 -0.55906600 -0.69799900

O 1.47509700 0.09362900 -1.51557800

O 3.38167200 -0.35620300 -0.39373800

C 3.99898400 0.79003100 -1.00580000

C 3.59880300 2.06271300 -0.28303200

H 3.71143800 0.82353600 -2.05965000

H 5.06983200 0.59482900 -0.92511100

H 3.87231200 2.00187000 0.77352200

H 4.11438000 2.91861600 -0.72867500

H 2.52131600 2.22229900 -0.36164400

H -4.53712800 -1.20240400 -1.84094500

C -5.06235100 0.34586200 -0.40490800

H -4.57095400 1.14376500 0.15553000

H -5.83004000 0.79555200 -1.03982600

H -5.54950600 -0.34049600 0.29132300

**TS3-trans**

E (M06-2X) = -1045.81 hartree

frequency = -535.04 cm-1

O -0.72437300 1.01654900 -0.89572900

B 1.65123900 1.63216000 -0.31159500

O 2.70762000 0.48773600 0.04521000

C 2.12835600 -0.63232300 -0.03689100

C 0.72248400 -0.59573800 -0.40901900

N 0.50421000 0.67824800 -0.80089600

F 2.19098400 2.41414600 -1.27222200

F 1.32588800 2.25610700 0.85602200

H 0.18691700 -1.43656500 -0.83782600

O 2.72179100 -1.74428200 0.24463600

C 4.12059500 -1.69174000 0.65956600

C 5.02490600 -1.56127600 -0.54791900

H 4.26136300 -2.63672700 1.18248400

H 4.23509300 -0.85893100 1.35561800

H 6.06631600 -1.60126100 -0.21851300

H 4.85276700 -2.38196900 -1.24774900

H 4.86351700 -0.60917200 -1.05745600

C -1.46429200 0.26526900 0.87275800

C -0.40185100 -0.54578800 1.30134500

H -0.55269700 -1.62006300 1.32091400

H 0.26976700 -0.13639900 2.05342800

C -1.78677500 1.58947100 1.51155100

H -2.31757600 2.24090400 0.81711500

H -2.42047700 1.43924800 2.39312900

H -0.86344000 2.08197300 1.82284100

C -2.50364200 -0.46320600 0.09268300

O -2.33484800 -1.57264100 -0.37707300

O -3.61925600 0.25326600 -0.08131200

C -4.63904200 -0.34098100 -0.90176000

C -5.46627000 -1.33697000 -0.10993300

H -4.16226300 -0.81482400 -1.76295100

H -5.24198300 0.50433100 -1.23725700

H -5.90702100 -0.85607000 0.76723700

H -6.27586300 -1.72507600 -0.73466200

**CA1-cis**

E (M06-2X) = -970.45 hartree

O 0.80681300 1.67817300 -1.06888100

B -0.39884200 -0.31151400 -1.72359200

O -1.48586600 -0.70581600 1.50198600

C -1.89410000 0.18128700 0.79081500

C -1.02447800 1.30610000 0.23706600

N -0.31493800 0.85894800 -0.95489300

F -1.45912100 -1.11463700 -1.56615500

F 0.51044500 -0.61750300 -2.63689800

C -4.02745100 -0.79489900 0.72532800

H -1.66275800 2.15826900 -0.01531400

H -3.58811200 -1.71648400 0.33303800

H -4.06700400 -0.87071100 1.81565000

O -3.15217400 0.29579500 0.37547200

C 4.53984500 -0.39360800 0.16560400

C 3.65271700 0.67691800 0.10028400

C 2.30653400 0.51288300 0.44050800

C 1.85800700 -0.74729300 0.85067400

C 2.74500800 -1.82224400 0.90686000

C 4.08472700 -1.64903000 0.56675500

H 5.58294400 -0.24947500 -0.09780900

H 4.00567000 1.65283900 -0.22414600

H 0.82051600 -0.89870000 1.13679500

H 2.38507100 -2.79633000 1.22291000

H 4.77252600 -2.48731600 0.61696700

C 1.37253700 1.68835700 0.26477700

C 0.12983500 1.72186400 1.17993000

H 1.94027000 2.62071400 0.30857100

H 0.21975800 1.03056500 2.01890600

H -0.04215800 2.72667600 1.56820200

C -5.37944200 -0.49700500 0.11770300

H -5.30228800 -0.41566700 -0.96888500

H -6.07630900 -1.30408100 0.35725500

H -5.78389100 0.43870300 0.51111700

**CA1-trans**

E (M06-2X) = -970.45 hartree

O -0.83081700 1.34478000 -0.14097700

B 1.27753100 2.52366800 0.06643400

O 2.20594400 -0.04152800 1.31028900

C 2.12814300 -0.36816200 0.15159000

C 1.07369300 0.13852900 -0.82873000

N 0.54752100 1.42627500 -0.41250800

F 2.59116400 2.55501000 -0.18389200

F 0.70603000 3.54743500 0.68396500

C 3.92277200 -1.86823000 0.40919400

H 1.50623600 0.16993300 -1.83216300

H 4.54361500 -1.06829000 0.82160500

H 3.42149600 -2.37024700 1.24189800

O 2.91825300 -1.27140200 -0.43471400

C -4.43658300 -1.54161000 0.99112100

C -3.09132300 -1.19040800 1.09264300

C -2.51463900 -0.33092000 0.15735800

C -3.29847900 0.18879100 -0.87637800

C -4.64460800 -0.15384900 -0.97116600

C -5.21547500 -1.02277900 -0.04084300

H -4.87676600 -2.21095700 1.72343300

H -2.48710000 -1.58228000 1.90713400

H -2.85122000 0.87447600 -1.58981900

H -5.25093500 0.26062500 -1.77046100

H -6.26511400 -1.28842200 -0.11683400

C -1.04732900 -0.01326000 0.24021200

C -0.17002500 -0.77292500 -0.76316400

H -0.67137700 -0.16669700 1.26183100

H 0.06529400 -1.79189400 -0.44947600

H -0.67074100 -0.80436300 -1.73420700

C 4.71652700 -2.82928700 -0.44685500

H 5.19525400 -2.30246000 -1.27555100

H 5.49344500 -3.30485600 0.15699300

H 4.06977200 -3.60897100 -0.85633600

**CA2-cis**

E (M06-2X) = -896.67 hartree

C -0.89258900 -0.11960500 1.76168400

C 0.61179300 -0.23916100 2.03934000

H -1.48894200 -0.22129300 2.67384000

H 0.99083000 -1.25534500 1.90374300

H 0.84603000 0.08952400 3.05304100

C -1.40697300 -1.05363900 0.67307700

C -2.87329200 -0.80031600 0.33051100

H -1.27336000 -2.08692100 1.02221900

H -0.78840000 -0.93732600 -0.22581600

C -3.39646800 -1.74268900 -0.75210400

H -3.48724200 -0.90936600 1.23634400

H -2.98647900 0.23962900 0.00076700

C -4.86106800 -1.48060400 -1.09634500

H -2.77931900 -1.63125900 -1.65244300

H -3.27496400 -2.78212300 -0.41980000

H -5.21926100 -2.16134700 -1.87353800

H -5.49859700 -1.61085100 -0.21550700

H -4.99778400 -0.45610300 -1.45693800

O -1.03089500 1.25629800 1.39066100

B -0.09178900 2.26611400 -0.60504700

O 1.35539300 -0.26783800 -1.19016100

C 1.87836700 -0.00285900 -0.13627900

C 1.22333400 0.75578300 1.01323600

N 0.07547700 1.51655800 0.56589000

F -1.28421700 2.70534300 -0.99231800

F 0.98992900 2.60227300 -1.31368600

H 1.98455700 1.38433600 1.48510800

O 3.11228700 -0.38009800 0.21569700

C 3.81870900 -1.21113100 -0.72720100

C 3.36118100 -2.65337600 -0.61779500

H 4.86818300 -1.09742400 -0.45298900

H 3.65633400 -0.81342600 -1.73139400

H 2.30662200 -2.74264300 -0.88941700

H 3.94428600 -3.28006100 -1.29802800

H 3.50444600 -3.02434400 0.40052600

**CA2-trans**

E (M06-2X) = -896.67 hartree

C 1.18907400 -0.11689500 1.04776200

C 0.24687800 -1.04471700 0.26465500

H 1.43783500 -0.51957100 2.03425800

H -0.33693600 -1.67053400 0.94376800

H 0.77095900 -1.69639000 -0.43591200

C 2.45736100 0.26464400 0.29180700

C 3.48242200 -0.86759400 0.23896000

H 2.89447400 1.13589800 0.79356600

H 2.19361300 0.58168100 -0.72604100

C 4.75880700 -0.47395100 -0.50391400

H 3.74129500 -1.17373400 1.26238500

H 3.04801700 -1.75297200 -0.24578100

C 5.78588100 -1.60318000 -0.54300900

H 4.50070600 -0.17153600 -1.52666600

H 5.19653600 0.40914100 -0.02204300

H 6.69121800 -1.30312700 -1.07735400

H 6.07728300 -1.90119400 0.46948000

H 5.37716700 -2.48635100 -1.04508300

O 0.36707300 1.02404400 1.31201800

B -0.77796600 2.51147800 -0.23378800

O -2.92843000 0.33792400 0.37258200

C -2.15351200 -0.35829900 -0.23130300

C -0.68078300 -0.03748600 -0.46682500

N -0.30527600 1.23738000 0.09799000

F -0.47776900 3.58990000 0.47823600

F -1.50690400 2.64148400 -1.34776400

H -0.50838000 -0.03844600 -1.54773000

O -2.46146100 -1.53342500 -0.79754500

C -3.81761800 -1.99050400 -0.62404000

C -4.00099300 -2.62665500 0.74077000

H -3.96487800 -2.71120800 -1.42954900

H -4.49135900 -1.14190600 -0.76330600

H -5.01689600 -3.02064600 0.83222900

H -3.29762400 -3.45258300 0.87587100

H -3.84676400 -1.88855700 1.53104700

**CA3-cis**

E (M06-2X) = -1045.88 hartree

O 0.47634900 1.22775100 -0.47998400

B -1.59943900 2.44159200 -0.13458000

O -2.52781100 -0.27341200 -1.10563100

C -2.01581700 -0.69234500 -0.09954900

C -1.08450100 0.11824900 0.80332400

N -0.73941700 1.38451800 0.20247300

F -2.81095100 2.46257000 0.42875000

F -1.22181100 3.44419000 -0.91284300

H -1.61483800 0.28403500 1.74635200

O -2.20426100 -1.91915300 0.40242700

C -3.11518500 -2.77317100 -0.32120100

C -4.55533100 -2.43780100 0.01595000

H -2.84896500 -3.78170500 -0.00186000

H -2.91853900 -2.66247100 -1.39008100

H -5.22482700 -3.13450800 -0.49596900

H -4.72687400 -2.52202800 1.09203600

H -4.79977700 -1.42441700 -0.30932500

C 1.27397600 0.47985900 0.43628100

C 0.28979900 -0.56100500 1.02120600

H 0.49484400 -0.75870100 2.07382600

H 0.34220600 -1.50949800 0.48345500

C 1.87550900 1.39453800 1.50251600

H 2.47901200 0.81481300 2.20424800

H 2.50022600 2.15594000 1.02856100

H 1.06892000 1.89220000 2.04749000

C 2.38226500 -0.17028500 -0.37956800

O 2.63816700 0.06458600 -1.53028500

O 3.05586600 -1.04122200 0.39166300

C 4.18752700 -1.68938900 -0.22209300

C 5.39974900 -0.77738900 -0.21944300

H 3.91235300 -1.98422600 -1.23745700

H 4.35061000 -2.58011000 0.38628500

H 5.64108500 -0.46403600 0.79959100

H 6.26256300 -1.30825600 -0.63100700

H 5.21555400 0.10657700 -0.83378400

**CA3-trans**

E (M06-2X) = -1045.81 hartree

O -0.63863300 0.24224100 1.29063400

B 0.24648900 2.19177500 0.13650800

O 2.82798500 0.58123100 0.90479100

C 2.37426400 -0.20881900 0.11686800

C 0.92533000 -0.24140900 -0.35745700

N 0.12967900 0.80117800 0.25788900

F 1.05980300 2.67165700 -0.80882200

F -0.45580200 3.03187100 0.88347500

H 0.92323800 -0.12176400 -1.44534500

O 3.07064600 -1.19013800 -0.47076900

C 4.47316000 -1.26599000 -0.14247400

C 5.27160000 -0.25281600 -0.94028500

H 4.75302700 -2.28996100 -0.39389000

H 4.58763400 -1.10752300 0.93249200

H 6.33665700 -0.36839500 -0.72104700

H 5.12099500 -0.40473400 -2.01200700

H 4.97403900 0.76415000 -0.67620900

C -1.07441300 -0.98913000 0.72597400

C 0.19692900 -1.54072200 0.07133400

H -0.01886400 -2.19641200 -0.77087900

H 0.78258100 -2.08355100 0.81734500

C -1.65567300 -1.83861200 1.84211500

H -2.52321600 -1.34031300 2.28026500

H -1.96048000 -2.81179900 1.44876900

H -0.89857300 -1.98444100 2.61596800

C -2.14721300 -0.72381400 -0.34513900

O -2.22436100 -1.34186600 -1.38264000

O -2.99381400 0.22911200 0.03478700

C -4.07311900 0.52922900 -0.87154700

C -5.20106800 -0.47343100 -0.71820000

H -3.68064100 0.53637900 -1.89117000

H -4.38554400 1.53584200 -0.59137200

H -5.55746600 -0.49259100 0.31490000

H -6.03583900 -0.19177200 -1.36586600

H -4.86711000 -1.47354200 -1.00314000
